# Supplementary material
Source: publisher figshare collection journal article supplement (https://tandf.figshare.com/articles/dataset/_/26424411)

## SUPPLEMENTARY TABLES

**Supplementary Table 1.** *ICD* codes for food allergies

| <b>ICD code</b> | <b>Version type</b> | <b>Short description</b>                                    | <b>Allergy type</b>   | <b>Broader allergy category</b> |
|-----------------|---------------------|-------------------------------------------------------------|-----------------------|---------------------------------|
| 99561           | <i>ICD-9</i>        | ANPHYLCT REACT PEANUTS                                      | Peanut                | Peanut                          |
| 99562           | <i>ICD-9</i>        | ANPHYLCT REACT CRSTACNS                                     | Shellfish             | Shellfish/fish                  |
| 99564           | <i>ICD-9</i>        | ANPHYL REACT TR NTS SEED                                    | Tree nut              | Tree nut                        |
| 99567           | <i>ICD-9</i>        | ANPHYLCT REACT MILK PROD                                    | Milk                  | Milk                            |
| 99568           | <i>ICD-9</i>        | ANPHYLCT REACTION EGGS                                      | Egg                   | Egg                             |
| T780            | <i>ICD-10</i>       | ANAPHYLACTIC REACTION DUE TO FOOD                           | Unspecified           | Unspecified                     |
| T7800           | <i>ICD-10</i>       | ANAPHYLACTIC REACTION DUE TO UNSPECIFIED FOOD               | Unspecified           | Unspecified                     |
| T7800XA         | <i>ICD-10</i>       | ANAPHYLACTIC REACTION DUE TO UNSPECIFIED FOOD, INIT ENCNR   | Unspecified           | Unspecified                     |
| T7800XD         | <i>ICD-10</i>       | ANAPHYLACTIC REACTION DUE TO UNSPECIFIED FOOD, SUBS ENCNR   | Unspecified           | Unspecified                     |
| T7800XS         | <i>ICD-10</i>       | ANAPHYLACTIC REACTION DUE TO UNSPECIFIED FOOD, SEQUELA      | Unspecified           | Unspecified                     |
| T7801           | <i>ICD-10</i>       | ANAPHYLACTIC REACTION DUE TO PEANUTS                        | Peanut                | Peanut                          |
| T7801XA         | <i>ICD-10</i>       | ANAPHYLACTIC REACTION DUE TO PEANUTS, INITIAL ENCOUNTER     | Peanut                | Peanut                          |
| T7801XD         | <i>ICD-10</i>       | ANAPHYLACTIC REACTION DUE TO PEANUTS, SUBSEQUENT ENCOUNTER  | Peanut                | Peanut                          |
| T7801XS         | <i>ICD-10</i>       | ANAPHYLACTIC REACTION DUE TO PEANUTS, SEQUELA               | Peanut                | Peanut                          |
| T7802           | <i>ICD-10</i>       | ANAPHYLACTIC REACTION DUE TO SHELLFISH (CRUSTACEANS)        | Shellfish             | Shellfish/fish                  |
| T7802XA         | <i>ICD-10</i>       | ANAPHYLACTIC REACTION DUE TO SHELLFISH (CRUSTACEANS), INIT  | Shellfish             | Shellfish/fish                  |
| T7802XD         | <i>ICD-10</i>       | ANAPHYLACTIC REACTION DUE TO SHELLFISH (CRUSTACEANS), SUBS  | Shellfish             | Shellfish/fish                  |
| T7802XS         | <i>ICD-10</i>       | ANAPHYL REACTION DUE TO SHELLFISH (CRUSTACEANS), SEQUELA    | Shellfish             | Shellfish/fish                  |
| T7803XA         | <i>ICD-10</i>       | ANAPHYLACTIC REACTION DUE TO OTHER FISH, INITIAL ENCOUNTER  | Fish                  | Shellfish/fish                  |
| T7803XD         | <i>ICD-10</i>       | ANAPHYLACTIC REACTION DUE TO OTHER FISH, SUBS ENCNR         | Fish                  | Shellfish/fish                  |
| T7803XS         | <i>ICD-10</i>       | ANAPHYLACTIC REACTION DUE TO OTHER FISH, SEQUELA            | Fish                  | Shellfish/fish                  |
| T7804XA         | <i>ICD-10</i>       | ANAPHYLACTIC REACTION DUE TO FRUITS AND VEGETABLES, INIT    | Fruits and vegetables | Fruits and vegetables           |
| T7804XD         | <i>ICD-10</i>       | ANAPHYLACTIC REACTION DUE TO FRUITS AND VEGETABLES, SUBS    | Fruits and vegetables | Fruits and vegetables           |
| T7804XS         | <i>ICD-10</i>       | ANAPHYLACTIC REACTION DUE TO FRUITS AND VEGETABLES, SEQUELA | Fruits and vegetables | Fruits and vegetables           |
| T7805           | <i>ICD-10</i>       | ANAPHYLACTIC REACTION DUE TO TREE NUTS AND SEEDS            | Tree nut              | Tree nut                        |
| T7805XA         | <i>ICD-10</i>       | ANAPHYLACTIC REACTION DUE TO TREE NUTS AND SEEDS, INIT      | Tree nut              | Tree nut                        |

| <b>ICD code</b> | <b>Version type</b> | <b>Short description</b>                                    | <b>Allergy type</b> | <b>Broader allergy category</b> |
|-----------------|---------------------|-------------------------------------------------------------|---------------------|---------------------------------|
| T7805XD         | ICD-10              | ANAPHYLACTIC REACTION DUE TO TREE NUTS AND SEEDS, SUBS      | Tree nut            | Tree nut                        |
| T7805XS         | ICD-10              | ANAPHYLACTIC REACTION DUE TO TREE NUTS AND SEEDS, SEQUELA   | Tree nut            | Tree nut                        |
| T7807           | ICD-10              | ANAPHYLACTIC REACTION DUE TO MILK AND DAIRY PRODUCTS        | Milk                | Milk                            |
| T7807XA         | ICD-10              | ANAPHYLACTIC REACTION DUE TO MILK AND DAIRY PRODUCTS, INIT  | Milk                | Milk                            |
| T7807XD         | ICD-10              | ANAPHYLACTIC REACTION DUE TO MILK AND DAIRY PRODUCTS, SUBS  | Milk                | Milk                            |
| T7807XS         | ICD-10              | ANAPHYL REACTION DUE TO MILK AND DAIRY PRODUCTS, SEQUELA    | Milk                | Milk                            |
| T7808           | ICD-10              | ANAPHYLACTIC REACTION DUE TO EGGS                           | Egg                 | Egg                             |
| T7808XA         | ICD-10              | ANAPHYLACTIC REACTION DUE TO EGGS, INITIAL ENCOUNTER        | Egg                 | Egg                             |
| T7808XD         | ICD-10              | ANAPHYLACTIC REACTION DUE TO EGGS, SUBSEQUENT ENCOUNTER     | Egg                 | Egg                             |
| T7808XS         | ICD-10              | ANAPHYLACTIC REACTION DUE TO EGGS, SEQUELA                  | Egg                 | Egg                             |
| T7809           | ICD-10              | ANAPHYLACTIC REACTION DUE TO OTHER FOOD PRODUCTS            | Unspecified         | Unspecified                     |
| T7809XA         | ICD-10              | ANAPHYLACTIC REACTION DUE TO OTH FOOD PRODUCTS, INIT ENCNTR | Unspecified         | Unspecified                     |
| T7809XD         | ICD-10              | ANAPHYLACTIC REACTION DUE TO OTH FOOD PRODUCTS, SUBS ENCNTR | Unspecified         | Unspecified                     |
| T7809XS         | ICD-10              | ANAPHYLACTIC REACTION DUE TO OTHER FOOD PRODUCTS, SEQUELA   | Unspecified         | Unspecified                     |
| V1501           | ICD-9               | HX-PEANUT ALLERGY                                           | Peanut              | Peanut                          |
| V1502           | ICD-9               | HX-MILK PROD ALLERGY                                        | Milk                | Milk                            |
| V1503           | ICD-9               | HX-EGGS ALLERGY                                             | Egg                 | Egg                             |
| V1504           | ICD-9               | HX-SEAFOOD ALLERGY                                          | Fish                | Shellfish/fish                  |
| V1505           | ICD-9               | HX-OTHER FOOD ALLERGY                                       | Unspecified         | Unspecified                     |
| Z9101           | ICD-10              | FOOD ALLERGY STATUS                                         | Unspecified         | Unspecified                     |
| Z91010          | ICD-10              | ALLERGY TO PEANUTS                                          | Peanut              | Peanut                          |
| Z91011          | ICD-10              | ALLERGY TO MILK PRODUCTS                                    | Milk                | Milk                            |
| Z91012          | ICD-10              | ALLERGY TO EGGS                                             | Egg                 | Egg                             |
| Z91013          | ICD-10              | ALLERGY TO SEAFOOD                                          | Fish                | Shellfish/fish                  |
| Z91018          | ICD-10              | ALLERGY TO OTHER FOODS                                      | Unspecified         | Unspecified                     |

**Abbreviation:** ICD, *International Classification of Diseases*.

**Supplementary Table 2.** *ICD* codes for exclusion

| <b>ICD code</b> | <b>Version type</b> | <b>Description</b>                                                                       |
|-----------------|---------------------|------------------------------------------------------------------------------------------|
| K90.4X          | <i>ICD-10</i>       | Malabsorption due to intolerance, not elsewhere classified/non-celiac gluten sensitivity |
| 579.80          | <i>ICD-9</i>        | Other specified intestinal malabsorption                                                 |
| E73.9           | <i>ICD-10</i>       | Lactose intolerance, unspecified                                                         |
| 271.30          | <i>ICD-9</i>        | Intestinal disaccharidase deficiencies and disaccharide malabsorption                    |
| K90.0           | <i>ICD-10</i>       | Celiac disease                                                                           |
| 579.0           | <i>ICD-9</i>        | Celiac disease                                                                           |
| E74.12          | <i>ICD-10</i>       | Hereditary fructose intolerance                                                          |
| 271.2           | <i>ICD-9</i>        | Hereditary fructose intolerance                                                          |
| K52.21          | <i>ICD-10</i>       | Food protein-induced enterocolitis syndrome                                              |
| 558.3           | <i>ICD-9</i>        | Allergic gastroenteritis and colitis                                                     |
| K52.22          | <i>ICD-10</i>       | Food protein-induced enteropathy                                                         |
| K90.X           | <i>ICD-10</i>       | Intestinal malabsorption                                                                 |
| K20.0           | <i>ICD-10</i>       | Eosinophilic esophagitis                                                                 |
| 530.13          | <i>ICD-9</i>        | Eosinophilic esophagitis                                                                 |
| K52.81          | <i>ICD-10</i>       | Eosinophilic gastritis or gastroenteritis                                                |
| 535.7x          | <i>ICD-9</i>        | Eosinophilic gastritis                                                                   |
| 535.70          | <i>ICD-9</i>        | Eosinophilic gastritis, without mention of hemorrhage                                    |
| 535.71          | <i>ICD-9</i>        | Eosinophilic gastritis, with hemorrhage                                                  |
| 558.41          | <i>ICD-9</i>        | Eosinophilic gastroenteritis                                                             |

**Abbreviation:** *ICD*, *International Classification of Diseases*.

**Supplementary Table 3.** Characteristics of pediatric and adult patients with food allergies

| Characteristic                       | Age 0–17 years<br>( <i>n</i> = 220,356) | Age ≥18 years<br>( <i>n</i> = 135,164) |
|--------------------------------------|-----------------------------------------|----------------------------------------|
| Age, y, mean (SD)                    | 8.2 (4.8)                               | 38 (15)                                |
| Age group, <i>n</i> (%)              |                                         |                                        |
| 0–1 y                                | 16,390 (7.4)                            | -                                      |
| 2–5 y                                | 60,984 (28)                             | -                                      |
| 6–10 y                               | 66,764 (30)                             | -                                      |
| 11–17 y                              | 76,218 (35)                             | -                                      |
| 18–25 y                              | -                                       | 36,977 (27)                            |
| 26–30 y                              | -                                       | 11,365 (8.4)                           |
| 31–64 y                              | -                                       | 82,730 (61)                            |
| ≥65 y                                | -                                       | 4092 (3.0)                             |
| Sex, female, <i>n</i> (%)            | 100,403 (46)                            | 93,125 (69)                            |
| Insured, <i>n</i> (%)                |                                         |                                        |
| Commercial                           | 122,500 (56)                            | 108,003 (80)                           |
| Medicaid                             | 97,856 (44)                             | 23,242 (17)                            |
| Medicare                             | 0                                       | 3919 (2.9)                             |
| CCI score, mean (SD)                 | 0.26 (0.48)                             | 0.51 (1.02)                            |
| CCI score, <i>n</i> (%)              |                                         |                                        |
| 0                                    | 166,663 (76)                            | 91,990 (68)                            |
| 1                                    | 51,974 (24)                             | 30,063 (22)                            |
| 2                                    | 1277 (0.6)                              | 7536 (5.6)                             |
| ≥3                                   | 622 (0.3)                               | 5575 (4.1)                             |
| Comorbidities, <i>n</i> (%)          |                                         |                                        |
| Allergic rhinitis                    | 49,665 (23)                             | 27,802 (21)                            |
| Asthma                               | 49,304 (22)                             | 24,045 (18)                            |
| Atopic dermatitis/eczema             | 29,646 (13)                             | 4675 (3.5)                             |
| Anxiety                              | 8658 (3.9)                              | 22,505 (17)                            |
| GERD                                 | 9672 (4.4)                              | 17,418 (13)                            |
| Hives (urticaria, CSU)               | 13,757 (6.2)                            | 8763 (6.5)                             |
| Depression                           | 4734 (2.1)                              | 15,579 (12)                            |
| Conjunctivitis                       | 4102 (1.9)                              | 3040 (2.2)                             |
| Food allergy types, <i>n</i> (%)     |                                         |                                        |
| Single food allergy                  | 84,190 (38)                             | 48,769 (36)                            |
| Multiple food allergies <sup>a</sup> | 49,251 (22)                             | 13,635 (10)                            |
| Unspecified only                     | 86,915 (39)                             | 72,760 (54)                            |
| Food allergen type, <i>n</i> (%)     |                                         |                                        |
| Peanut                               | 70,955 (32.2)                           | 17,248 (12.8)                          |
| Shellfish                            | 26,758 (12.1)                           | 33,188 (24.6)                          |
| Milk                                 | 23,117 (10.5)                           | 5740 (4.2)                             |
| Egg                                  | 22,969 (10.4)                           | 3923 (2.9)                             |
| Tree nut                             | 17,186 (7.8)                            | 6013 (4.4)                             |
| Unspecified                          | 121,257 (55.0)                          | 83,213 (61.6)                          |

**Abbreviations:** CCI, Charlson Comorbidity Index; CSU, chronic spontaneous urticaria; GERD, gastroesophageal reflux disease; y, years.

<sup>a</sup>Unspecified allergy types included.

**Notes:** CCI and comorbidities were assessed during the 12-month baseline period. Race is not uniformly captured in the MarketScan databases and therefore is not included.

**Supplementary Table 4.** Significant ( $p < 0.05$ ) factors associated with all-cause and food allergy-related HRU

| Outpatient visits       |                                 | Emergency department visits |                                     | Hospitalizations        |                                     |
|-------------------------|---------------------------------|-----------------------------|-------------------------------------|-------------------------|-------------------------------------|
| Factor                  | Incident rate ratio<br>(95% CI) | Factor                      | Odds ratio <sup>a</sup><br>(95% CI) | Factor                  | Odds ratio <sup>a</sup><br>(95% CI) |
| All-cause               |                                 |                             |                                     |                         |                                     |
| CCI score: $\geq 2$     | 2.6 (2.5–2.6)                   | Payer: Medicaid             | 4.8 (4.0–5.9)                       | CCI score: $\geq 2$     | 4.1 (3.9–4.3)                       |
| Anxiety                 | 1.6 (1.5–1.6)                   | Age $\geq 18$ years         | 1.6 (1.6–1.6)                       | Age $\geq 18$ years     | 2.4 (2.3–2.5)                       |
| Depression              | 1.5 (1.5–1.6)                   | CCI score: $\geq 2$         | 1.6 (1.5–1.6)                       | Depression              | 2.0 (1.9–2.1)                       |
| CCI score: 1            | 1.5 (1.5–1.5)                   | Depression                  | 1.5 (1.4–1.5)                       | Payer: Medicaid         | 2.0 (1.3–3.1)                       |
| Allergic rhinitis       | 1.4 (1.3–1.4)                   | CCI score: 1                | 1.3 (1.3–1.4)                       | CCI score: 1            | 1.9 (1.8–2.0)                       |
| Payer: Medicaid         | 1.4 (1.3–1.5)                   | Anxiety                     | 1.3 (1.2–1.3)                       | Anxiety                 | 1.4 (1.3–1.5)                       |
| Age $\geq 18$ years     | 1.3 (1.3–1.3)                   | MFA                         | 1.1 (1.1–1.1)                       | Female sex              | 1.2 (1.1–1.2)                       |
| Allergic conjunctivitis | 1.2 (1.2–1.3)                   | Asthma                      | 1.1 (1.1–1.1)                       | Region: West            | 0.9 (0.9–1.0)                       |
| MFA                     | 1.1 (1.1–1.2)                   | Atopic dermatitis           | 1.0 (1.0–1.1)                       | Hives                   | 0.9 (0.9–1.0)                       |
| Unspecified FA          | 1.1 (1.1–1.1)                   | Female sex                  | 1.0 (1.0–1.0)                       | Asthma                  | 0.9 (0.8–0.9)                       |
| Hives                   | 1.0 (1.0–1.1)                   | Region: North Central       | 1.0 (0.9–1.0)                       | Allergic rhinitis       | 0.8 (0.8–0.8)                       |
| Atopic dermatitis       | 1.0 (1.0–1.1)                   | Hives                       | 1.0 (0.9–1.0)                       | Allergic conjunctivitis | 0.8 (0.7–0.9)                       |
| Region: Northeast       | 1.0 (1.0–1.1)                   | Region: Northeast           | 0.9 (0.9–0.9)                       | Unspecified FA          | 0.8 (0.8–0.8)                       |
| Region: North Central   | 1.0 (1.0–1.0)                   | Allergic conjunctivitis     | 0.8 (0.8–0.9)                       |                         |                                     |
| Region: West            | 1.0 (1.0–1.0)                   | Allergic rhinitis           | 0.8 (0.8–0.8)                       |                         |                                     |
| Asthma                  | 0.8 (0.8–0.8)                   | Region: West                | 0.8 (0.7–0.8)                       |                         |                                     |
|                         |                                 | Region: unknown             | 0.8 (0.7–1.0)                       |                         |                                     |
|                         |                                 | Unspecified FA              | 0.7 (0.7–0.7)                       |                         |                                     |
| Food allergy-related    |                                 |                             |                                     |                         |                                     |
| MFA                     | 1.8 (1.8–1.8)                   | Payer: Medicaid             | 3.8 (2.9–5.0)                       | CCI score: $\geq 2$     | 2.9 (2.5–3.3)                       |
| Hives                   | 1.1 (1.1–1.2)                   | Age $\geq 18$ years         | 2.4 (2.3–2.4)                       | Depression              | 2.1 (1.9–2.4)                       |
| CCI score: $\geq 2$     | 1.1 (1.1–1.1)                   | Depression                  | 1.3 (1.2–1.3)                       | CCI score: 1            | 2.0 (1.7–2.2)                       |
| Region: West            | 1.1 (1.1–1.1)                   | MFA                         | 1.1 (1.1–1.1)                       | MFA                     | 1.4 (1.3–1.5)                       |
| Allergic rhinitis       | 1.1 (1.1–1.1)                   | Asthma                      | 1.1 (1.0–1.1)                       | Anxiety                 | 1.2 (1.1–1.3)                       |
| Allergic conjunctivitis | 1.1 (1.1–1.1)                   | Anxiety                     | 1.0 (0.9–1.0)                       | Atopic dermatitis       | 1.2 (1.1–1.3)                       |
| Atopic dermatitis       | 1.1 (1.1–1.1)                   | Region: Northeast           | 0.9 (0.8–0.9)                       | Age $\geq 18$ years     | 1.1 (1.0–1.2)                       |
| Unspecified FA          | 1.1 (1.1–1.1)                   | CCI score: $\geq 2$         | 0.9 (0.8–0.9)                       | Female sex              | 0.9 (0.8–1.0)                       |
| Region: North Central   | 1.0 (1.0–1.1)                   | Atopic dermatitis           | 0.8 (0.8–0.8)                       | Allergic rhinitis       | 0.7 (0.6–0.8)                       |
| Asthma                  | 1.0 (1.0–1.0)                   | Allergic conjunctivitis     | 0.7 (0.6–0.7)                       | Unspecified FA          | 0.6 (0.5–0.6)                       |
| Anxiety                 | 1.0 (1.0–1.0)                   | Region: North Central       | 0.7 (0.7–0.8)                       |                         |                                     |

| Outpatient visits |               | Emergency department visits |               | Hospitalizations |
|-------------------|---------------|-----------------------------|---------------|------------------|
| CCI score: 1      | 1.0 (1.0–1.0) | Region: West                | 0.7 (0.7–0.7) |                  |
| Region: Northeast | 1.0 (1.0–1.0) | Allergic rhinitis           | 0.6 (0.6–0.6) |                  |
| Female sex        | 1.0 (1.0–1.0) | Hives                       | 0.5 (0.5–0.5) |                  |
| Depression        | 1.0 (0.9–1.0) | Unspecified FA              | 0.4 (0.4–0.4) |                  |
| Payer: Medicaid   | 0.8 (0.8–0.9) |                             |               |                  |
| Age ≥18 years     | 0.8 (0.8–0.8) |                             |               |                  |

**Abbreviations:** CCI, Charlson Comorbidity Index; CI, confidence interval; FA, food allergies; MFA, multiple food allergies (unspecified allergy types included).

<sup>a</sup>Odds of having the event compared with a reference group: age 0–17 years; sex: male; region: south; CCI score: 0; comorbid condition: absence; allergy type: single; payer: Commercial/Medicare.

**Supplementary Table 5.** Significant ( $p < 0.05$ ) factors associated with all-cause and food allergy-related health care costs

| Outpatient visits           |                                 | Emergency department visits |                                     | Hospitalizations    |                                     |
|-----------------------------|---------------------------------|-----------------------------|-------------------------------------|---------------------|-------------------------------------|
| Factor                      | Incident rate ratio<br>(95% CI) | Factor                      | Odds ratio <sup>a</sup><br>(95% CI) | Factor              | Odds ratio <sup>a</sup><br>(95% CI) |
| <b>All-cause</b>            |                                 |                             |                                     |                     |                                     |
| CCI score: $\geq 2$         | 4.8 (4.6–5.2)                   | CCI score: $\geq 2$         | 1.7 (1.6–1.8)                       | CCI score: $\geq 2$ | 1.9 (1.6–2.3)                       |
| CCI score: 1                | 1.8 (1.7–1.9)                   | Age $\geq 18$ years         | 1.4 (1.4–1.5)                       | Atopic dermatitis   | 1.5 (1.2–2.0)                       |
| Age $\geq 18$ years         | 1.8 (1.7–1.8)                   | Depression                  | 1.2 (1.2–1.3)                       | Region: Northeast   | 1.3 (1.1–1.5)                       |
| Anxiety                     | 1.5 (1.5–1.6)                   | CCI score: 1                | 1.2 (1.2–1.3)                       | Region: West        | 1.2 (1.0–1.5)                       |
| Depression                  | 1.3 (1.3–1.4)                   | Anxiety                     | 1.2 (1.2–1.3)                       | Female sex          | 0.9 (0.8–1.0)                       |
| Region: Northeast           | 1.2 (1.2–1.2)                   | Region: West                | 1.2 (1.2–1.2)                       | Asthma              | 0.8 (0.6–0.9)                       |
| Allergic rhinitis           | 1.1 (1.1–1.2)                   | Female sex                  | 1.1 (1.1–1.1)                       |                     |                                     |
| Region: West                | 1.1 (1.1–1.2)                   | MFA                         | 1.1 (1.0–1.1)                       |                     |                                     |
| MFA                         | 1.1 (1.1–1.1)                   | Hives                       | 1.1 (1.0–1.1)                       |                     |                                     |
| Unspecified FA              | 1.1 (1.0–1.1)                   | Region: North Central       | 0.9 (0.9–0.9)                       |                     |                                     |
| Atopic dermatitis           | 1.1 (1.0–1.1)                   |                             |                                     |                     |                                     |
| Region: North Central       | 1.1 (1.0–1.1)                   |                             |                                     |                     |                                     |
| Female sex                  | 1.0 (1.0–1.1)                   |                             |                                     |                     |                                     |
| Asthma                      | 0.7 (0.7–0.7)                   |                             |                                     |                     |                                     |
| <b>Food allergy-related</b> |                                 |                             |                                     |                     |                                     |
| CCI score: $\geq 2$         | 1.9 (1.8–2.0)                   | Region: West                | 1.4 (1.3–1.4)                       | Region: Northeast   | 1.3 (1.1–1.7)                       |
| MFA                         | 1.5 (1.4–1.5)                   | Region: Northeast           | 1.2 (1.1–1.2)                       |                     |                                     |
| CCI score: 1                | 1.3 (1.2–1.4)                   | Age $\geq 18$ years         | 1.1 (1.1–1.2)                       |                     |                                     |
| Age $\geq 18$ years         | 1.2 (1.1–1.2)                   | MFA                         | 1.1 (1.0–1.1)                       |                     |                                     |
| Region: Northeast           | 1.1 (1.1–1.2)                   | Female sex                  | 1.0 (1.0–1.1)                       |                     |                                     |
| Region: West                | 1.1 (1.1–1.1)                   | Hives                       | 0.9 (0.8–1.0)                       |                     |                                     |
| Female sex                  | 1.0 (0.9–1.0)                   |                             |                                     |                     |                                     |
| Allergic rhinitis           | 0.9 (0.8–0.9)                   |                             |                                     |                     |                                     |
| Allergic conjunctivitis     | 0.9 (0.8–1.0)                   |                             |                                     |                     |                                     |
| Hives                       | 0.9 (0.8–0.9)                   |                             |                                     |                     |                                     |
| Unspecified FA              | 0.9 (0.9–1.0)                   |                             |                                     |                     |                                     |
| Asthma                      | 0.8 (0.7–0.8)                   |                             |                                     |                     |                                     |

**Abbreviations:** CCI, Charlson Comorbidity Index; CI, confidence interval; FA, food allergies; MFA, multiple food allergies (unspecified allergy types included).

<sup>a</sup>Odds of having the event compared to a reference group: age 0–17 y; sex: male; region: south; CCI score: 0; comorbid condition: absence; allergy type: single; payer: Commercial/Medicare.

## SUPPLEMENTARY FIGURES

**Supplementary Figure 1.** Health care resource use among pediatric and adult patients with food allergies.

Proportion of patients with one or more (A) all-cause visit and (B) food allergy-related visit.

**Abbreviation:** ED, emergency department.

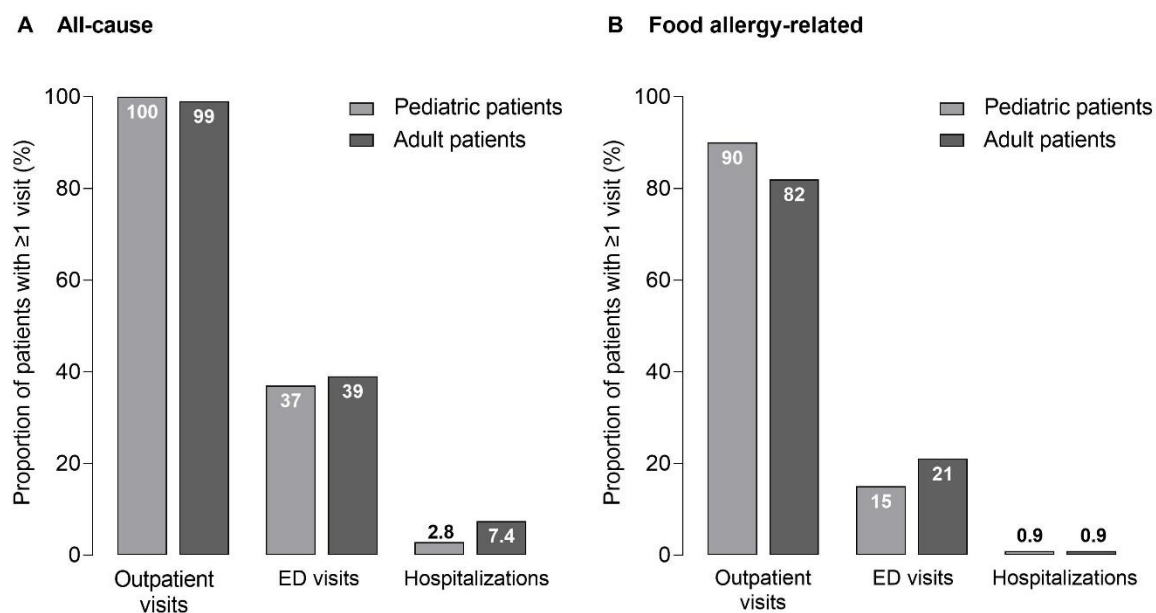



**Supplementary Figure 2.** Estimated mean (SD) 1-year direct medical cost per pediatric and adult patient with food allergies (2022 USD).

(A) All-cause cost, (B) food allergy-related cost, and (C) food allergy-related cost among patients with visits (outpatient visits, ED visits, and hospitalizations).

**Abbreviations:** ED, emergency department; USD, United States dollars.

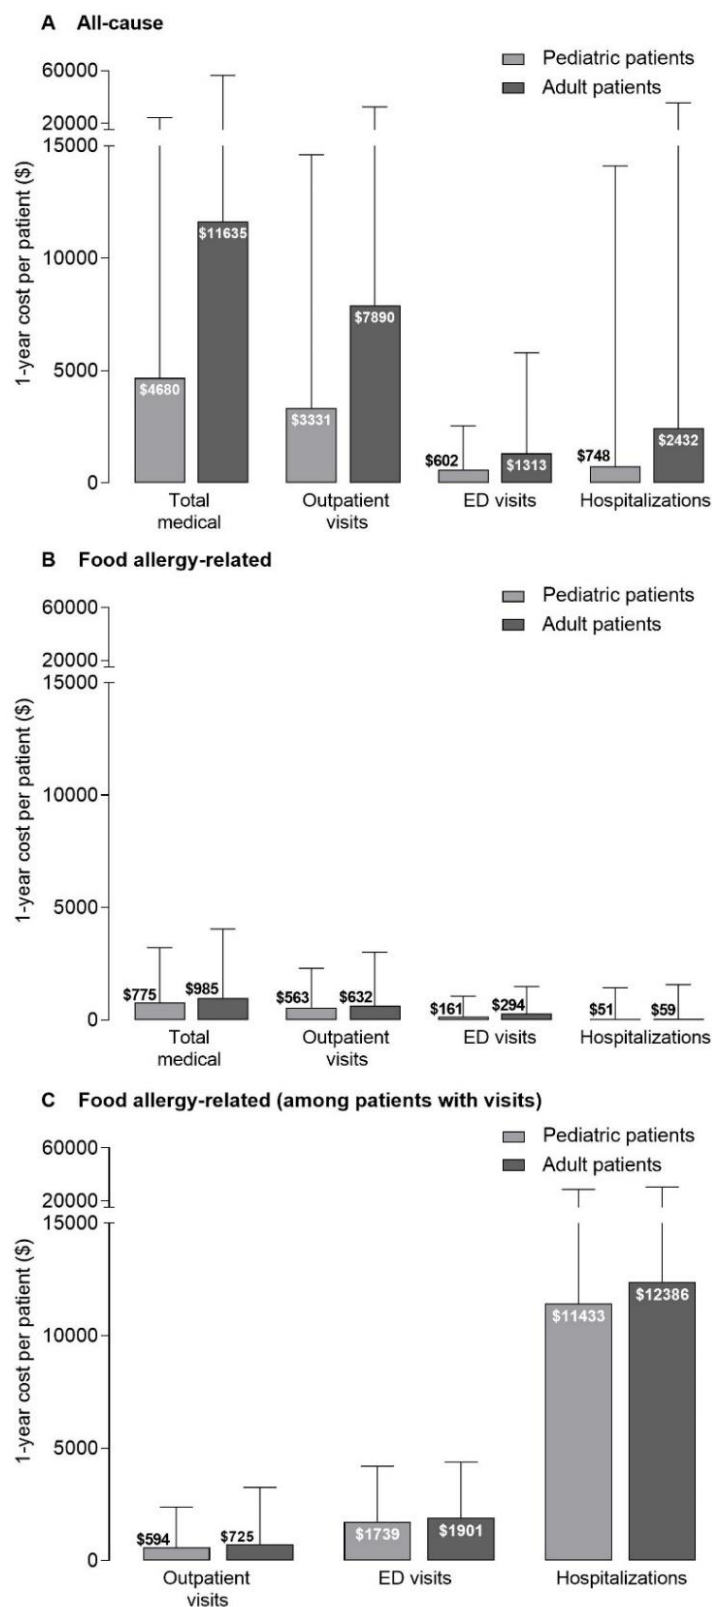

**Supplementary Figure 3.** Estimated mean (SD) 1-year out-of-pocket cost per pediatric and adult patient with food allergies (2022 USD).

(A) All-cause cost, (B) food allergy-related cost, and (C) food allergy-related cost among patients with visits (outpatient visits, ED visits, and hospitalizations).

**Abbreviations:** ED, emergency department; USD, United States dollars.

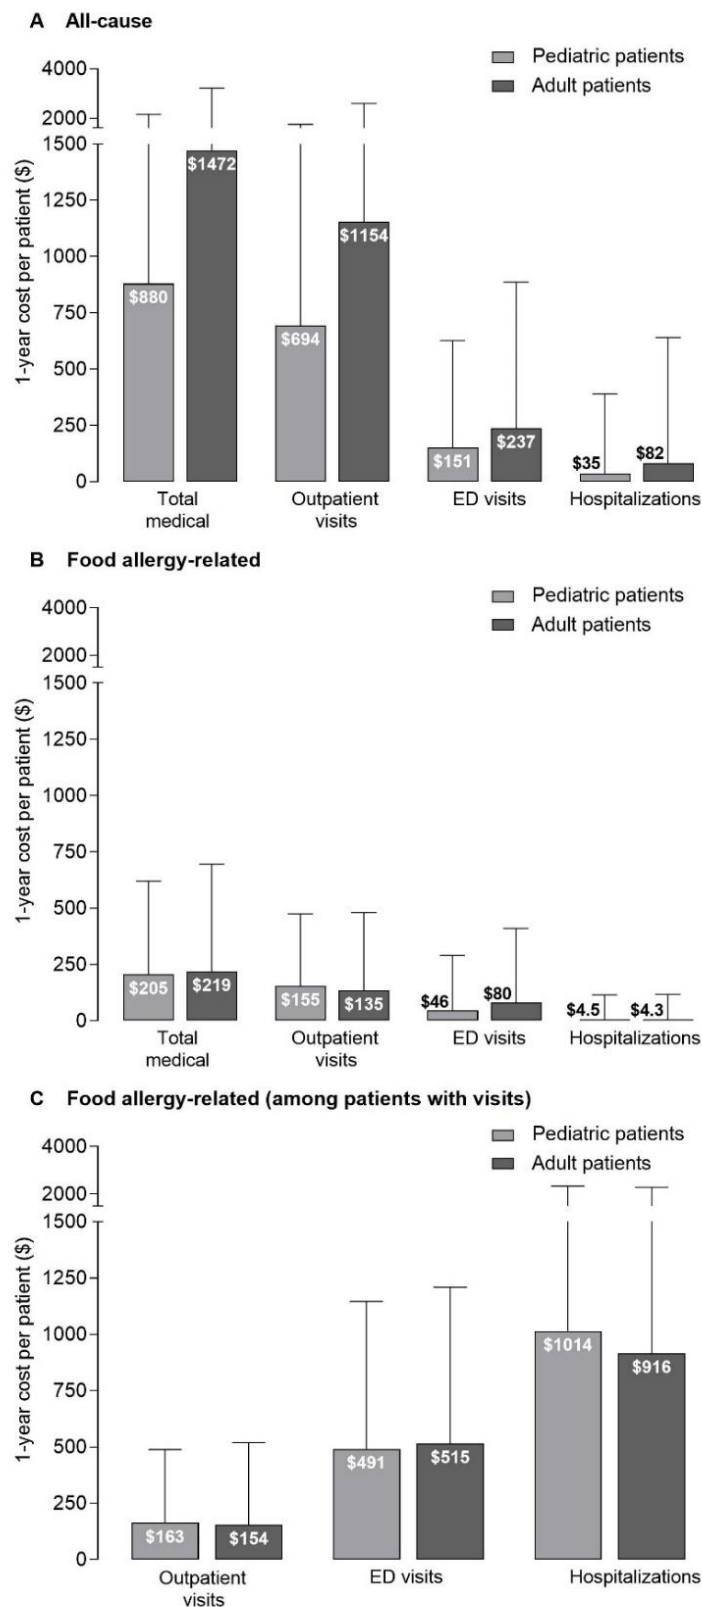

Supplement: Supplementary file 1 [file 2]
